# Supplementary material for: Role of inorganic layers on polysulfide decomposition at sodium-metal anode surfaces for room temperature Na/S batteries
Source: Royal Society of Chemistry journal article supplement (doi:10.1039/d3cp03048b), 2023-01-01
Supplement: d3cp03048b1.pdf [file d3cp03048b1.pdf]

## Supporting information

### Role of Inorganic Layers on Polysulfide Decomposition at Sodium-Metal Anode Surfaces for Room Temperature Na/S Batteries

Sirisak Singesen<sup>†,‡</sup>, Francisco Ospina-Acevedo<sup>‡</sup>, Suwit Suthirakun<sup>#</sup>, Pussana Hirunsit<sup>‡</sup>, Perla B. Balbuena<sup>‡,§,\*,#</sup>

<sup>†</sup>School of Physics, Institute of Science, Suranaree University of Technology, Nakhon Ratchasima 30000, Thailand

<sup>‡</sup>Department of Chemical Engineering, Texas A&M University, College Station, Texas 77843, United States

<sup>#</sup>School of Chemistry, Institute of Science, Suranaree University of Technology, Nakhon Ratchasima 30000, Thailand

<sup>‡</sup>National Nanotechnology Center (NANOTEC), National Science and Technology Development Agency (NSTDA), Pathum Thani, Thailand

<sup>§</sup>Department of Materials Science and Engineering, Texas A&M University, College Station, Texas 77843, United States

<sup>#</sup> Department of Chemistry, Texas A&M University, College Station, Texas 77843, United States

\*Email: balbuena@tamu.edu

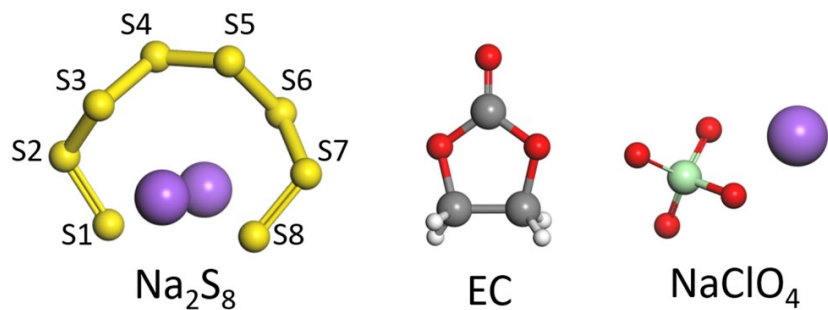

**Figure S1.** Optimized  $\text{Na}_2\text{S}_8$ , ethylene carbonate (EC), and  $\text{NaClO}_4$  molecule.

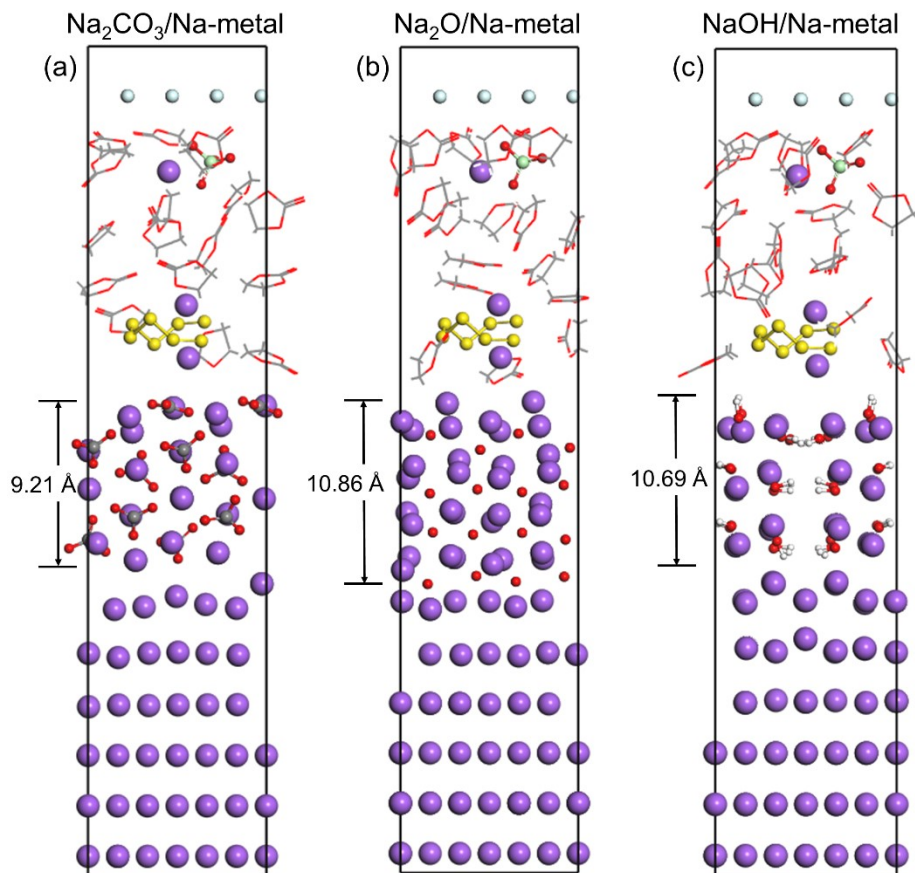

**Figure S2.** Initial configurations used for AIMD simulation of  $\text{Na}_2\text{S}_8$  decomposition with the introduction of different SEI layers in EC solvent for (a)  $\text{Na}_2\text{CO}_3$ , (b)  $\text{Na}_2\text{O}$ , and (c)  $\text{NaOH}$ . The wireframe structures are EC molecules. Code colors: Na atom; purple, F; blue, Cl; green, O; red, C; grey, and H; white.

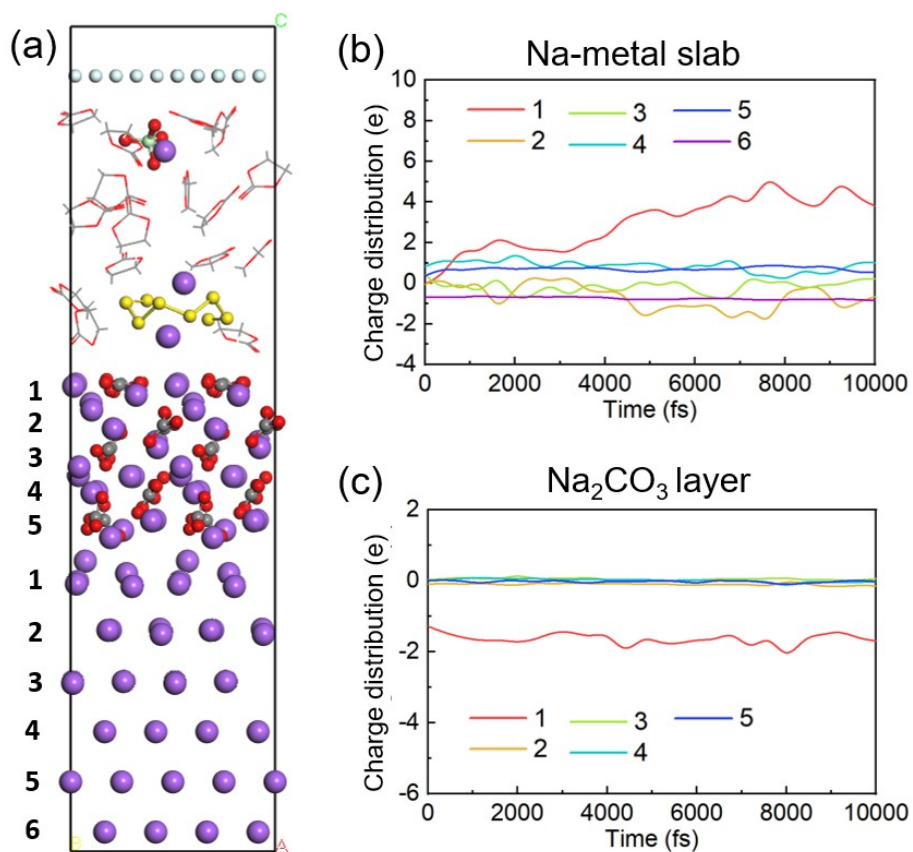

**Figure S3.** (a) Initial Na<sub>2</sub>CO<sub>3</sub>/Na-metal configuration with the labels of the Na<sub>2</sub>CO<sub>3</sub> layers (above) and the Na-metal layers (below). The corresponding charge distribution evolution in (b) the Na-metal layers and (c) the Na<sub>2</sub>CO<sub>3</sub> layers. Code colors: Na atom; purple, F; blue, Cl; green, O; red, C; gray, and H; white.

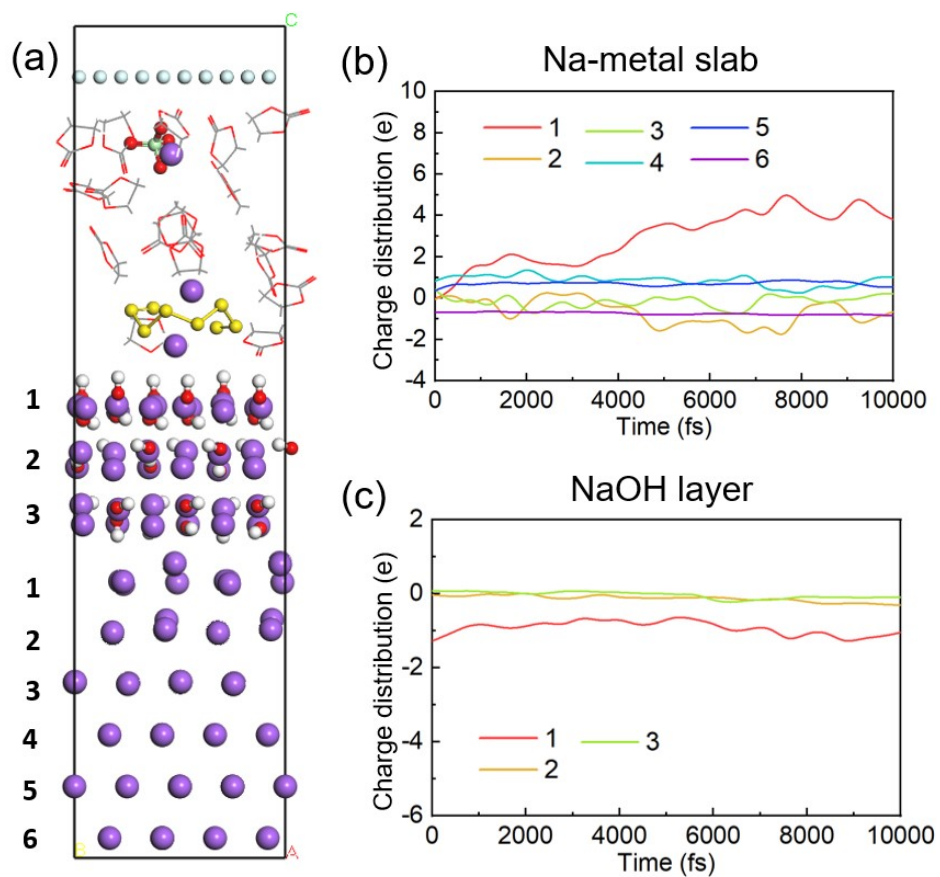

**Figure S4.** (a) Initial NaOH/Na-metal configuration with the labels of the NaOH layers (above) and the Na-metal layers (below). The corresponding charge distribution evolution in (b) the Na-metal layers and (c) the NaOH layers. Code colors: Na atom; purple, F; blue, Cl; green, O; red, C; gray, and H; white.

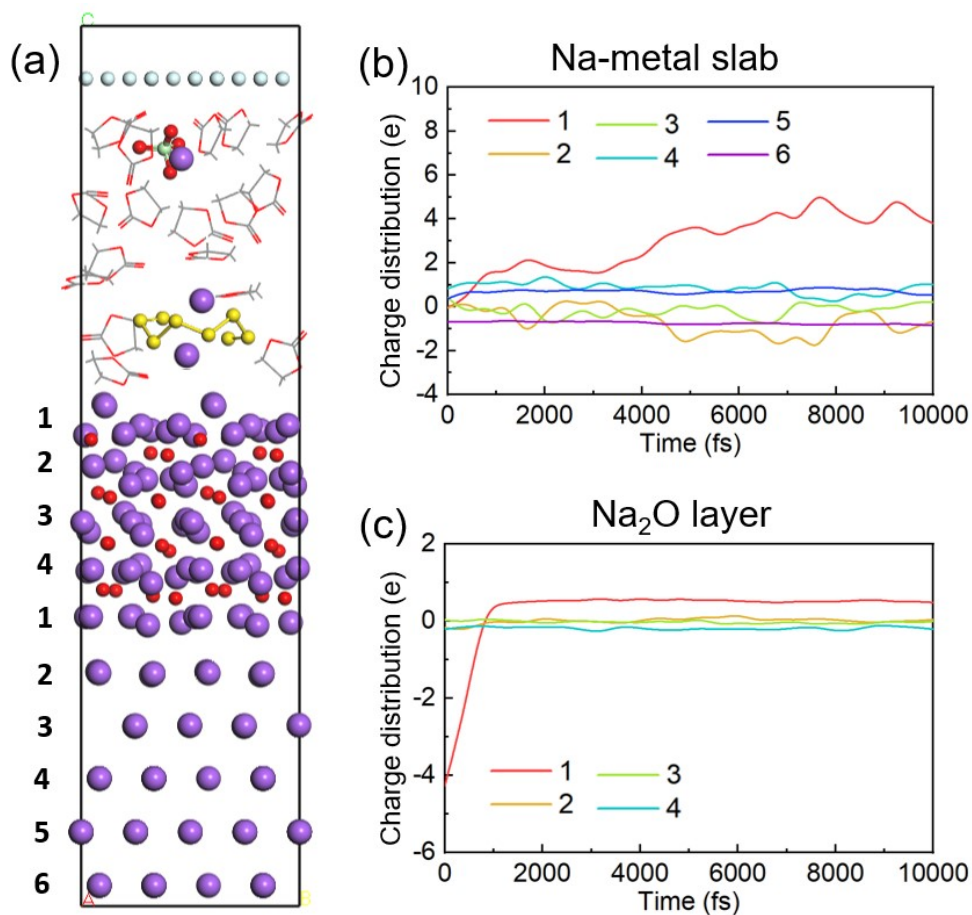

**Figure S5.** (a) Initial Na<sub>2</sub>O/Na-metal configuration with the labels of the Na<sub>2</sub>O layers (above) and the Na-metal layers (below). The corresponding charge distribution evolution in (b) the Na-metal layers and (c) the Na<sub>2</sub>O layers. Code colors: Na atom; purple, F; blue, Cl; green, O; red, C; grey, and H; white.

**Table S1.** Summary of geometric parameters of the bulk structures

| Structures                      | Lattice constants (Å) |          |          | Angle (°) |         |          |
|---------------------------------|-----------------------|----------|----------|-----------|---------|----------|
|                                 | <i>a</i>              | <i>b</i> | <i>c</i> | $\alpha$  | $\beta$ | $\gamma$ |
| Na-metal                        | 3.582                 | 3.582    | 6.080    | 90        | 90      | 120      |
| Na <sub>2</sub> CO <sub>3</sub> | 8.749                 | 5.259    | 5.911    | 90        | 103.4   | 90       |
| NaOH                            | 3.351                 | 10.685   | 3.334    | 90        | 90      | 90       |
| Na <sub>2</sub> O               | 5.431                 | 5.431    | 5.431    | 90        | 90      | 90       |

**Table S2.** The summary of the lattice parameters of SEI layer supercells with different facets before making heterostructure and the lattice mismatch of the SEI layers against the Na-metal slab upon combining the Na-metal slab.

| Materials                       | supercell | facet | lattice parameters (Å) |       | lattice mismatch (%) |        |
|---------------------------------|-----------|-------|------------------------|-------|----------------------|--------|
|                                 |           |       | a                      | b     | a                    | b      |
| Na <sub>2</sub> CO <sub>3</sub> | 2 × 2     | (100) | 10.52                  | 11.82 | -2.15                | -4.74  |
|                                 | 1 × 2     | (010) | 8.75                   | 11.82 | -18.60               | -4.74  |
|                                 | 1 × 2     | (001) | 8.75                   | 10.52 | -18.60               | -15.25 |
|                                 | 3 × 1     | (110) | 10.00                  | 10.68 | -6.95                | -13.95 |
| Na <sub>2</sub> O               | 2 × 2     | (100) | 10.86                  | 10.86 | 1.03                 | -12.45 |
|                                 | 2 × 2     | (010) | 10.86                  | 10.86 | 1.03                 | -12.50 |
|                                 | 2 × 2     | (001) | 10.86                  | 10.86 | 1.03                 | -12.50 |
|                                 | 1 × 2     | (110) | 7.68                   | 10.86 | -28.54               | -12.50 |
| NaOH                            | 3 × 1     | (100) | 10.3                   | 12.56 | -4.18                | 1.20   |
|                                 | 3 × 3     | (010) | 10.3                   | 10.68 | -4.18                | -13.90 |
|                                 | 3 × 1     | (001) | 10.3                   | 12.56 | -4.18                | 1.20   |
|                                 | 3 × 1     | (110) | 10.3                   | 11.12 | -4.18                | -10.40 |

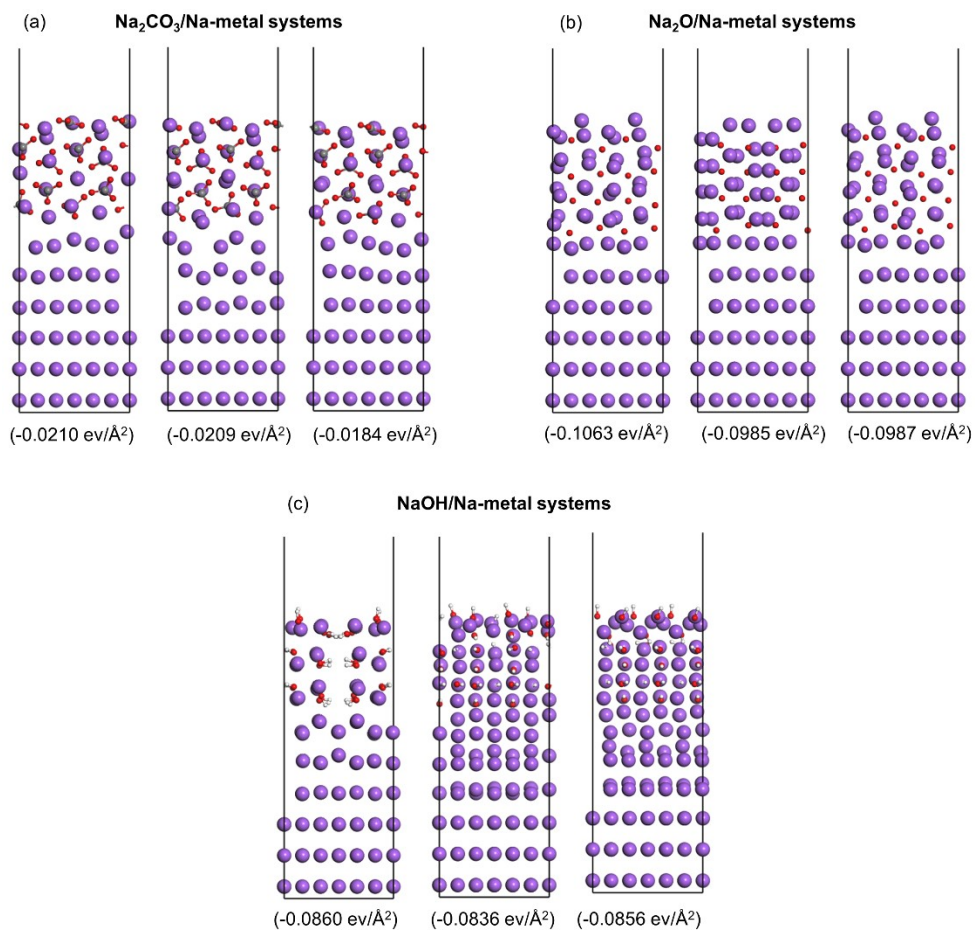

**Figure S6.** Three possible configurations of (a) Na<sub>2</sub>CO<sub>3</sub>, (b) Na<sub>2</sub>O, and (c) NaOH layer on the Na-metal surface. The values of the interface formation energies are shown in the parentheses. Color codes depict purple; Na, red; O, black; C, and white; H atoms.
